# Supplementary material for: Utilising Fourier transform ion cyclotron resonance mass spectrometry (FT-ICR MS) to track the oxidation of lignin by an alkaliphilic laccase
Source: Royal Society of Chemistry journal article supplement (doi:10.1039/d4an00124a), 2024-01-01
Supplement: d4an00124a2.pdf [file d4an00124a2.pdf]

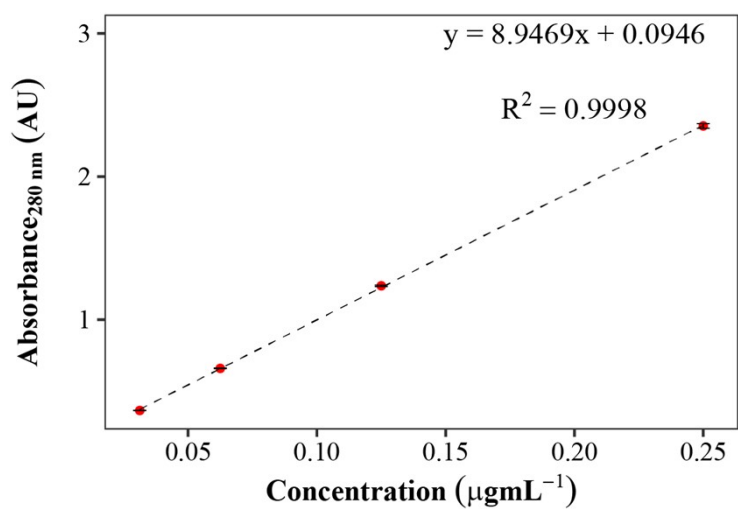

Figure S1, Standard curve of different dilutions of Sigma Kraft Lignin (SKL). Each sample was tested in triplicate to ensure that the calibration curve was sufficient, error bars of the sample represent the standard error of each lignin concentration tested.

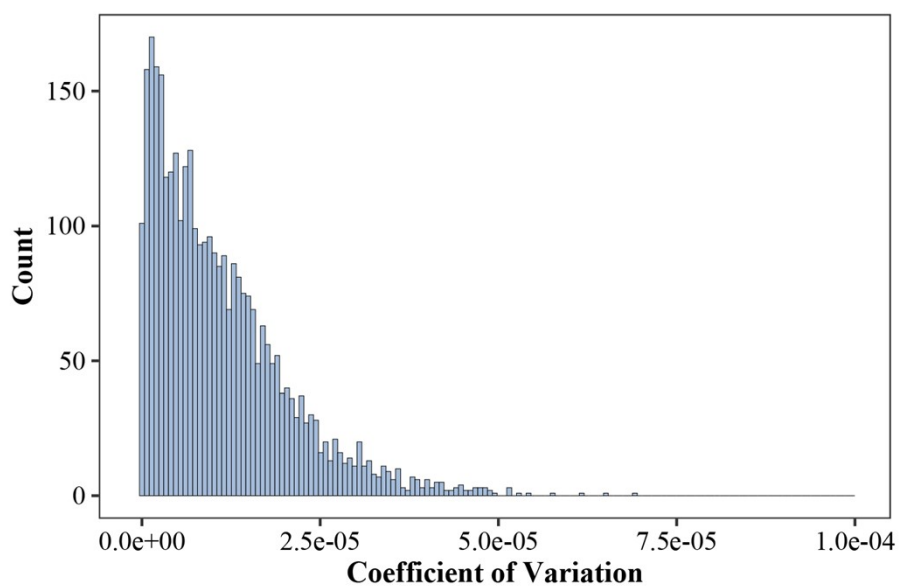

Figure S2, The calculated coefficient of variation (CoV) for the quality control samples. The variation is left-skewed and extremely low (between 0 and  $7.5 \times 10^{-5}$ ) indicating that there is minimal variation between the same peaks of the three QC replicates.

Table S1, Number of ions detected by the FT-ICR MS experiment, and the number of ions assigned by Formularity.

| Time | Replicate | Treatment           | Total Number of Ions | Number of Ions Assigned | Assigned Ions (%) |
|------|-----------|---------------------|----------------------|-------------------------|-------------------|
| 0    | 1         | Enzyme-Only Control | 828                  | 588                     | 71.0              |
| 2    | 1         | Enzyme-Only Control | 903                  | 648                     | 71.8              |
| 24   | 1         | Enzyme-Only Control | 823                  | 597                     | 72.5              |
| 0    | 1         | Negative Control    | 9265                 | 5691                    | 61.4              |
| 0    | 2         | Negative Control    | 9756                 | 5752                    | 59.0              |
| 0    | 3         | Negative Control    | 9356                 | 5478                    | 58.6              |
| 2    | 1         | Negative Control    | 8778                 | 5300                    | 60.4              |
| 2    | 2         | Negative Control    | 9609                 | 5633                    | 58.6              |
| 2    | 3         | Negative Control    | 9489                 | 5485                    | 57.8              |
| 24   | 1         | Negative Control    | 9639                 | 5621                    | 58.3              |
| 24   | 2         | Negative Control    | 9417                 | 5487                    | 58.3              |
| 24   | 3         | Negative Control    | 9262                 | 5425                    | 58.6              |
| 0    | 1         | Laccase treated     | 9877                 | 5894                    | 59.7              |
| 0    | 2         | Laccase treated     | 9790                 | 5778                    | 59.0              |
| 0    | 3         | Laccase treated     | 9799                 | 5713                    | 58.3              |
| 2    | 1         | Laccase treated     | 9022                 | 5150                    | 57.1              |
| 2    | 2         | Laccase treated     | 9375                 | 5317                    | 56.7              |
| 2    | 3         | Laccase treated     | 9243                 | 5225                    | 56.5              |
| 24   | 1         | Laccase treated     | 7920                 | 4193                    | 52.9              |
| 24   | 2         | Laccase treated     | 8122                 | 4256                    | 52.4              |
| 24   | 3         | Laccase treated     | 8237                 | 4298                    | 52.2              |

Table S2, Count data for each mass bracket shown in Figure 3, counts and standard deviations are rounded to the nearest whole number.

| Mass Bracket (Da) | Treatment        | Time (Hrs) | Mean Count | Standard Deviation |
|-------------------|------------------|------------|------------|--------------------|
| 140-250           | Negative Control | 0          | 75         | 5                  |
| 140-250           | Negative Control | 2          | 77         | 5                  |
| 140-250           | Negative Control | 24         | 79         | 1                  |
| 140-250           | Laccase-treated  | 0          | 84         | 2                  |
| 140-250           | Laccase-treated  | 2          | 80         | 3                  |
| 140-250           | Laccase-treated  | 24         | 77         | 2                  |
| 250-350           | Negative Control | 0          | 428        | 17                 |
| 250-350           | Negative Control | 2          | 428        | 14                 |
| 250-350           | Negative Control | 24         | 432        | 5                  |
| 250-350           | Laccase-treated  | 0          | 447        | 8                  |
| 250-350           | Laccase-treated  | 2          | 438        | 4                  |
| 250-350           | Laccase-treated  | 24         | 424        | 5                  |
| 350-450           | Negative Control | 0          | 703        | 16                 |
| 350-450           | Negative Control | 2          | 702        | 15                 |
| 350-450           | Negative Control | 24         | 710        | 8                  |
| 350-450           | Laccase-treated  | 0          | 739        | 17                 |
| 350-450           | Laccase-treated  | 2          | 706        | 13                 |
| 350-450           | Laccase-treated  | 24         | 673        | 16                 |
| 450-550           | Negative Control | 0          | 824        | 19                 |
| 450-550           | Negative Control | 2          | 825        | 18                 |
| 450-550           | Negative Control | 24         | 828        | 15                 |
| 450-550           | Laccase-treated  | 0          | 874        | 26                 |
| 450-550           | Laccase-treated  | 2          | 835        | 13                 |
| 450-550           | Laccase-treated  | 24         | 755        | 4                  |
| 550-650           | Negative Control | 0          | 637        | 37                 |
| 550-650           | Negative Control | 2          | 619        | 19                 |
| 550-650           | Negative Control | 24         | 618        | 3                  |
| 550-650           | Laccase-treated  | 0          | 646        | 23                 |
| 550-650           | Laccase-treated  | 2          | 582        | 15                 |
| 550-650           | Laccase-treated  | 24         | 485        | 9                  |
| 650-750           | Negative Control | 0          | 460        | 17                 |
| 650-750           | Negative Control | 2          | 456        | 10                 |
| 650-750           | Negative Control | 24         | 452        | 17                 |
| 650-750           | Laccase-treated  | 0          | 443        | 10                 |
| 650-750           | Laccase-treated  | 2          | 417        | 8                  |
| 650-750           | Laccase-treated  | 24         | 305        | 6                  |
| 750-850           | Negative Control | 0          | 332        | 4                  |
| 750-850           | Negative Control | 2          | 327        | 11                 |
| 750-850           | Negative Control | 24         | 327        | 5                  |
| 750-850           | Laccase-treated  | 0          | 322        | 5                  |
| 750-850           | Laccase-treated  | 2          | 286        | 5                  |
| 750-850           | Laccase-treated  | 24         | 204        | 6                  |

|           |                  |    |     |    |
|-----------|------------------|----|-----|----|
| 850-950   | Negative Control | 0  | 270 | 8  |
| 850-950   | Negative Control | 2  | 246 | 17 |
| 850-950   | Negative Control | 24 | 255 | 12 |
| 850-950   | Laccase-treated  | 0  | 246 | 3  |
| 850-950   | Laccase-treated  | 2  | 198 | 4  |
| 850-950   | Laccase-treated  | 24 | 112 | 6  |
| 950-1050  | Negative Control | 0  | 182 | 12 |
| 950-1050  | Negative Control | 2  | 157 | 19 |
| 950-1050  | Negative Control | 24 | 161 | 7  |
| 950-1050  | Laccase-treated  | 0  | 173 | 15 |
| 950-1050  | Laccase-treated  | 2  | 130 | 6  |
| 950-1050  | Laccase-treated  | 24 | 33  | 3  |
| 1050-1150 | Negative Control | 0  | 69  | 18 |
| 1050-1150 | Negative Control | 2  | 49  | 10 |
| 1050-1150 | Negative Control | 24 | 56  | 4  |
| 1050-1150 | Laccase-treated  | 0  | 64  | 2  |
| 1050-1150 | Laccase-treated  | 2  | 35  | 4  |
| 1050-1150 | Laccase-treated  | 24 | 8   | 2  |
| 1150-1250 | Negative Control | 0  | 22  | 7  |
| 1150-1250 | Negative Control | 2  | 10  | 6  |
| 1150-1250 | Negative Control | 24 | 12  | 3  |
| 1150-1250 | Laccase-treated  | 0  | 15  | 4  |
| 1150-1250 | Laccase-treated  | 2  | 6   | 2  |
| 1150-1250 | Laccase-treated  | 24 | 2   | 1  |
| >1250     | Negative Control | 0  | 4   | 3  |
| >1250     | Negative Control | 2  | 3   | 3  |
| >1250     | Negative Control | 24 | 5   | 1  |
| >1250     | Laccase-treated  | 0  | 3   | 2  |
| >1250     | Laccase-treated  | 2  | 4   | 1  |
| >1250     | Laccase-treated  | 24 | 3   | 2  |

---

Table S3, Compounds used for spectra calibration of the digest samples and controls, the asterisk (\*) signifies compounds belonging to the identified polymer group.

| Number | Molecular Formulae                               | $m/z$ [M-H] <sup>-</sup> (Da) | Number | Molecular Formulae                                | $m/z$ [M-H] <sup>-</sup> (Da) |
|--------|--------------------------------------------------|-------------------------------|--------|---------------------------------------------------|-------------------------------|
| 1      | C <sub>10</sub> H <sub>9</sub> O <sub>6</sub>    | 225.0405                      | 33     | C <sub>20</sub> H <sub>19</sub> O <sub>7</sub>    | 371.1136                      |
| 2      | C <sub>16</sub> H <sub>29</sub> O <sub>2</sub>   | 253.2173                      | 34     | C <sub>20</sub> H <sub>21</sub> O <sub>7</sub>    | 373.1293                      |
| 3      | C <sub>16</sub> H <sub>31</sub> O <sub>2</sub>   | 255.2330                      | 35     | C <sub>18</sub> H <sub>19</sub> O <sub>9</sub>    | 379.1035                      |
| 4      | C <sub>16</sub> H <sub>15</sub> O <sub>4</sub>   | 271.0976                      | 36     | C <sub>20</sub> H <sub>21</sub> O <sub>8</sub>    | 389.1242                      |
| 5      | C <sub>18</sub> H <sub>31</sub> O <sub>2</sub>   | 279.2330                      | 37     | C <sub>21</sub> H <sub>41</sub> O <sub>6</sub>    | 389.2909                      |
| 6      | C <sub>18</sub> H <sub>33</sub> O <sub>2</sub>   | 281.2486                      | 38     | C <sub>22</sub> H <sub>37</sub> O <sub>6</sub> *  | 397.2596                      |
| 7      | C <sub>18</sub> H <sub>35</sub> O <sub>2</sub>   | 283.2643                      | 39     | C <sub>21</sub> H <sub>21</sub> O <sub>8</sub>    | 401.1242                      |
| 8      | C <sub>16</sub> H <sub>29</sub> O <sub>4</sub>   | 285.2071                      | 40     | C <sub>22</sub> H <sub>23</sub> O <sub>8</sub>    | 415.1398                      |
| 9      | C <sub>14</sub> H <sub>29</sub> O <sub>4</sub> S | 293.1792                      | 41     | C <sub>22</sub> H <sub>25</sub> O <sub>8</sub>    | 417.1555                      |
| 10     | C <sub>14</sub> H <sub>17</sub> O <sub>7</sub>   | 297.0980                      | 42     | C <sub>21</sub> H <sub>23</sub> O <sub>9</sub>    | 419.1348                      |
| 11     | C <sub>16</sub> H <sub>25</sub> O <sub>3</sub> S | 297.1530                      | 43     | C <sub>22</sub> H <sub>25</sub> O <sub>9</sub>    | 433.1504                      |
| 12     | C <sub>20</sub> H <sub>27</sub> O <sub>2</sub>   | 299.2017                      | 44     | C <sub>21</sub> H <sub>23</sub> O <sub>10</sub>   | 435.1297                      |
| 13     | C <sub>16</sub> H <sub>13</sub> O <sub>6</sub>   | 301.0718                      | 45     | C <sub>20</sub> H <sub>23</sub> O <sub>11</sub>   | 439.1246                      |
| 14     | C <sub>16</sub> H <sub>15</sub> O <sub>6</sub>   | 303.0874                      | 46     | C <sub>24</sub> H <sub>41</sub> O <sub>7</sub> *  | 441.2858                      |
| 15     | C <sub>17</sub> H <sub>27</sub> O <sub>3</sub> S | 311.1686                      | 47     | C <sub>22</sub> H <sub>25</sub> O <sub>10</sub>   | 449.1453                      |
| 16     | C <sub>18</sub> H <sub>31</sub> O <sub>4</sub>   | 311.2228                      | 48     | C <sub>26</sub> H <sub>45</sub> O <sub>8</sub> *  | 485.3120                      |
| 17     | C <sub>19</sub> H <sub>21</sub> O <sub>4</sub>   | 313.1445                      | 49     | C <sub>28</sub> H <sub>49</sub> O <sub>9</sub> *  | 529.3382                      |
| 18     | C <sub>12</sub> H <sub>17</sub> O <sub>10</sub>  | 321.0827                      | 50     | C <sub>30</sub> H <sub>53</sub> O <sub>10</sub> * | 573.3644                      |
| 19     | C <sub>18</sub> H <sub>29</sub> O <sub>3</sub> S | 325.1843                      | 51     | C <sub>31</sub> H <sub>37</sub> O <sub>11</sub>   | 585.2341                      |
| 20     | C <sub>18</sub> H <sub>31</sub> O <sub>5</sub>   | 327.2177                      | 52     | C <sub>32</sub> H <sub>57</sub> O <sub>11</sub> * | 617.3906                      |
| 21     | C <sub>18</sub> H <sub>33</sub> O <sub>5</sub>   | 329.2333                      | 53     | C <sub>33</sub> H <sub>59</sub> O <sub>12</sub>   | 647.4012                      |
| 22     | C <sub>17</sub> H <sub>15</sub> O <sub>7</sub>   | 331.0823                      | 54     | C <sub>34</sub> H <sub>61</sub> O <sub>12</sub>   | 661.4169                      |
| 23     | C <sub>12</sub> H <sub>19</sub> O <sub>11</sub>  | 339.0933                      | 55     | C <sub>34</sub> H <sub>61</sub> O <sub>13</sub> * | 677.4118                      |
| 24     | C <sub>19</sub> H <sub>31</sub> O <sub>3</sub> S | 339.1999                      | 56     | C <sub>36</sub> H <sub>65</sub> O <sub>13</sub> * | 705.4431                      |
| 25     | C <sub>19</sub> H <sub>17</sub> O <sub>6</sub>   | 341.1031                      | 57     | C <sub>35</sub> H <sub>65</sub> O <sub>14</sub>   | 709.4380                      |
| 26     | C <sub>12</sub> H <sub>21</sub> O <sub>11</sub>  | 341.1089                      | 58     | C <sub>38</sub> H <sub>69</sub> O <sub>14</sub> * | 749.4693                      |
| 27     | C <sub>18</sub> H <sub>33</sub> O <sub>6</sub>   | 345.2283                      | 59     | C <sub>40</sub> H <sub>73</sub> O <sub>15</sub> * | 793.4955                      |
| 28     | C <sub>20</sub> H <sub>33</sub> O <sub>5</sub>   | 353.2333                      | 60     | C <sub>42</sub> H <sub>77</sub> O <sub>16</sub> * | 837.5217                      |
| 29     | C <sub>19</sub> H <sub>19</sub> O <sub>7</sub>   | 359.1136                      | 61     | C <sub>44</sub> H <sub>81</sub> O <sub>17</sub> * | 881.5479                      |
| 30     | C <sub>18</sub> H <sub>17</sub> O <sub>8</sub>   | 361.0929                      | 62     | C <sub>46</sub> H <sub>85</sub> O <sub>18</sub> * | 925.5741                      |
| 31     | C <sub>18</sub> H <sub>19</sub> O <sub>8</sub>   | 363.1085                      | 63     | C <sub>48</sub> H <sub>89</sub> O <sub>19</sub> * | 969.6004                      |
| 32     | C <sub>24</sub> H <sub>47</sub> O <sub>2</sub>   | 367.3582                      |        |                                                   |                               |

**Formularity Assignment:**

The parameters used for assignment in Formularity can be found in the electronic supplementary materials at <https://doi.org/10.7488/ds/3828>. Briefly, Charge was set to 1, Ionization as proton\_detachment [M-p(negative)], with an alignment and formula tolerance of 0.500 ppm and a DB mass limit of 1000. Formulae were assigned using the lowest score achieved with Formula building blocks of CH<sub>2</sub>, H<sub>2</sub> and O included with a maximum relationship gap of 5 and atomic mass unit (AMU) error of 0.00002. A user defined filter was set as O <30 AND C <=100 AND N =0 AND P=0 AND S<=2.

Table S4, Average Resolution and Assignment Error of Spectra Assigned using *Formularity*.

| Treatment (Replicate) | Time (Hrs) | Average Resolution | Assignment Error ( $\pm$ ppb) |
|-----------------------|------------|--------------------|-------------------------------|
| Negative Control (1)  | 0          | 376,167            | 182                           |
| Negative Control (2)  | 0          | 387,110            | 184                           |
| Negative Control (3)  | 0          | 383,862            | 182                           |
| Negative Control (1)  | 2          | 381,063            | 184                           |
| Negative Control (2)  | 2          | 384,027            | 184                           |
| Negative Control (3)  | 2          | 384,314            | 183                           |
| Negative Control (1)  | 24         | 380,011            | 183                           |
| Negative Control (2)  | 24         | 385,673            | 184                           |
| Negative Control (3)  | 24         | 385,744            | 185                           |
| Laccase (1)           | 0          | 385,873            | 184                           |
| Laccase (2)           | 0          | 384,377            | 183                           |
| Laccase (3)           | 0          | 384,526            | 184                           |
| Laccase (1)           | 2          | 393,855            | 187                           |
| Laccase (2)           | 2          | 392,296            | 187                           |
| Laccase (3)           | 2          | 392,678            | 186                           |
| Laccase (1)           | 24         | 411,514            | 194                           |
| Laccase (2)           | 24         | 411,155            | 196                           |
| Laccase (3)           | 24         | 410,366            | 194                           |

Table S5 ANOVA and Post-hoc Tukey Analysis Tables for Ion Count Stats

**ANOVA**

> aov2 <- aov(n ~ Time \* Treatment, data = TP2Tx)

|                       | Df | Sum Sq | Mean Sq | F value | Pr(<F)   |     |
|-----------------------|----|--------|---------|---------|----------|-----|
| <b>Time</b>           | 2  | 829159 | 414579  | 62.33   | 4.58E-07 | *** |
| <b>Treatment</b>      | 1  | 482489 | 482489  | 72.54   | 1.97E-06 | *** |
| <b>Time:Treatment</b> | 2  | 660961 | 330480  | 49.69   | 1.56E-06 | *** |
| <b>Residuals</b>      | 12 | 79818  | 6652    |         |          |     |

Signif. codes: 0 '\*\*\*' 0.001 '\*\*' 0.01 '\*' 0.05 '.' 0.1 ' ' 1

**TukeyHSD**

Tukey multiple comparisons of means

95% family-wise confidence level

Fit: aov(formula = n ~ Time \* Treatment, data = TP2Tx)

Signif. codes: 0 '\*\*\*' 0.001 '\*\*' 0.01 '\*' 0.05 '.' 0.1 ' ' 1

| Time                           | diff     | lwr      | upr      | p adj     | significance |
|--------------------------------|----------|----------|----------|-----------|--------------|
| T2-T0                          | -223.333 | -348.955 | -97.7122 | 0.0012821 | **           |
| T24-T0                         | -523.833 | -649.455 | -398.212 | 0.0000003 | ***          |
| T24-T2                         | -300.5   | -426.121 | -174.879 | 0.000096  | ***          |
| Treatment                      | diff     | lwr      | upr      | p adj     |              |
| LaccaseTreated-NegativeControl | -327.444 | -411.212 | -243.677 | 2.00E-06  | **<br>*      |
| Time:Treatment                 | diff     | lwr      | upr      | p adj     |              |
| 2:Negative-0:Negative          | -106.333 | -330.007 | 117.3399 | 0.6152693 |              |
| 24:Negative-0:Negative         | -71.6667 | -295.34  | 152.0065 | 0.881699  |              |
| 24:Negative-2:Negative         | 34.66667 | -189.007 | 258.3399 | 0.9942304 |              |
| 2:Positive-0:Positive          | -340.333 | -564.007 | -116.66  | 0.0027071 | **           |
| 24:Positive-0:Positive         | -976     | -1199.67 | -752.327 | 0.0000001 | **<br>*      |
| 24:Positive-2:Positive         | -635.667 | -859.34  | -411.993 | 0.0000069 | **<br>*      |
| 0:Positive-0:Negative          | 52       | -171.673 | 275.6732 | 0.9656999 |              |
| 2:Positive-0:Negative          | -288.333 | -512.007 | -64.6601 | 0.0097396 | **           |
| 24:Positive-0:Negative         | -924     | -1147.67 | -700.327 | 0.0000001 | **<br>*      |
| 0:Positive-2:Negative          | 158.3333 | -65.3399 | 382.0065 | 0.2375494 |              |
| 2:Positive-2:Negative          | -182     | -405.673 | 41.6732  | 0.138829  |              |
| 24:Positive-2:Negative         | -817.667 | -1041.34 | -593.993 | 0.0000004 | **<br>*      |
| 0:Positive-24:Negative         | 123.6667 | -100.007 | 347.3399 | 0.4690461 |              |
| 2:Positive-24:Negative         | -216.667 | -440.34  | 7.006528 | 0.0596045 | .            |
| 24:Positive-24:Negative        | -852.333 | -1076.01 | -628.66  | 0.0000003 | **<br>*      |



Table S6 Poisson GLM results between Time 0 and Time 2 and 24. ns represents no significant difference between Treatment, Time points in each mass bracket, with  $p < 0.1$  '.',  $< 0.05$  '\*\*',  $< 0.01$  '\*\*\*',  $< 0.001$  '\*\*\*\*'.

| T0:T2 - T0:T24                    |          |            |          |          |     |
|-----------------------------------|----------|------------|----------|----------|-----|
| Laccase vs Negative Control       |          |            |          |          |     |
| Poisson Model                     | Estimate | Std. Error | z value  | Pr(> z ) |     |
| Laccase – Time 2 – 140-250 m/z    | -0.06697 | 0.130026   | -0.51507 | 0.606501 | ns  |
| Laccase – Time 24 – 140-250 m/z   | -0.13933 | 0.130368   | -1.06877 | 0.285172 | ns  |
| Laccase – Time 2 – 250-350 m/z    | -0.01953 | 0.055352   | -0.35279 | 0.724247 | ns  |
| Laccase – Time 24 – 250-350 m/z   | -0.06132 | 0.055513   | -1.10465 | 0.269313 | ns  |
| Laccase – Time 2 – 350-450 m/z    | -0.04473 | 0.043271   | -1.03374 | 0.301258 | ns  |
| Laccase – Time 24 – 350-450 m/z   | -0.10346 | 0.043474   | -2.37982 | 0.017321 | *   |
| Laccase – Time 2 – 450-550 m/z    | -0.04725 | 0.039863   | -1.18528 | 0.235906 | ns  |
| Laccase – Time 24 – 450-550 m/z   | -0.15203 | 0.040378   | -3.76518 | 0.000166 | *** |
| Laccase – Time 2 – 550-650 m/z    | -0.07562 | 0.046361   | -1.63117 | 0.102854 | ns  |
| Laccase – Time 24 – 550-650 m/z   | -0.25636 | 0.047596   | -5.38618 | 7.20E-08 | *** |
| Laccase – Time 2 – 650-750 m/z    | -0.05183 | 0.054841   | -0.94501 | 0.344656 | ns  |
| Laccase – Time 24 – 650-750 m/z   | -0.35463 | 0.057491   | -6.16855 | 6.89E-10 | *** |
| Laccase – Time 2 – 750-850 m/z    | -0.10454 | 0.065019   | -1.60777 | 0.107886 | ns  |
| Laccase – Time 24 – 750-850 m/z   | -0.44124 | 0.068517   | -6.43986 | 1.20E-10 | *** |
| Laccase – Time 2 – 850-950 m/z    | -0.12353 | 0.075012   | -1.64674 | 0.099611 | .   |
| Laccase – Time 24 – 850-950 m/z   | -0.73123 | 0.082987   | -8.81128 | 1.24E-18 | *** |
| Laccase – Time 2 – 950-1050 m/z   | -0.14432 | 0.091934   | -1.56985 | 0.11645  | ns  |
| Laccase – Time 24 – 950-1050 m/z  | -1.52789 | 0.125811   | -12.1444 | 6.15E-34 | *** |
| Laccase – Time 2 – 1050-1150 m/z  | -0.26803 | 0.162234   | -1.65211 | 0.098512 | .   |
| Laccase – Time 24 – 1050-1150 m/z | -1.82389 | 0.236701   | -7.70548 | 1.30E-14 | *** |
| Laccase – Time 2 – 1150-1250 m/z  | -0.13118 | 0.356598   | -0.36786 | 0.712977 | ns  |
| Laccase – Time 24 – 1150-1250 m/z | -1.29186 | 0.455806   | -2.83424 | 0.004593 | **  |
| Laccase – Time 2 – >1250 m/z      | 0.519124 | 0.646474   | 0.803008 | 0.42197  | ns  |
| Laccase – Time 24 – >1250 m/z     | -0.35895 | 0.631228   | -0.56865 | 0.569597 | ns  |

Table S7 Poisson GLM results between Time 2 and Time 0 and 24. ns represents no significant difference between Treatment, Time points in each mass bracket, with  $p < 0.1$  '.',  $< 0.05$  '\*\*',  $< 0.01$  '\*\*\*',  $< 0.001$  '\*\*\*\*'.

T2:T0 - T2:T24  
Laccase vs Negative Control

| Poisson Model                     | Estimate | Std. Error | z value  | Pr(> z ) |     |
|-----------------------------------|----------|------------|----------|----------|-----|
| Laccase – Time 0 – 140-250 m/z    | 0.066973 | 0.130026   | 0.515074 | 0.606501 | ns  |
| Laccase – Time 24 – 140-250 m/z   | -0.07236 | 0.130559   | -0.55423 | 0.579419 | ns  |
| Laccase – Time 0 – 250-350 m/z    | 0.019527 | 0.055352   | 0.352788 | 0.724247 | ns  |
| Laccase – Time 24 – 250-350 m/z   | -0.0418  | 0.055667   | -0.7508  | 0.452771 | ns  |
| Laccase – Time 0 – 350-450 m/z    | 0.044731 | 0.043271   | 1.03374  | 0.301258 | ns  |
| Laccase – Time 24 – 350-450 m/z   | -0.05873 | 0.043726   | -1.34311 | 0.179235 | ns  |
| Laccase – Time 0 – 450-550 m/z    | 0.047248 | 0.039863   | 1.185282 | 0.235906 | ns  |
| Laccase – Time 24 – 450-550 m/z   | -0.10478 | 0.04059    | -2.58149 | 0.009837 | **  |
| Laccase – Time 0 – 550-650 m/z    | 0.075623 | 0.046361   | 1.631172 | 0.102854 | ns  |
| Laccase – Time 24 – 550-650 m/z   | -0.18074 | 0.048345   | -3.73849 | 0.000185 | *** |
| Laccase – Time 0 – 650-750 m/z    | 0.051825 | 0.054841   | 0.945005 | 0.344656 | ns  |
| Laccase – Time 24 – 650-750 m/z   | -0.30281 | 0.057962   | -5.22425 | 1.75E-07 | *** |
| Laccase – Time 0 – 750-850 m/z    | 0.104536 | 0.065019   | 1.607768 | 0.107886 | ns  |
| Laccase – Time 24 – 750-850 m/z   | -0.33671 | 0.069582   | -4.83897 | 1.31E-06 | *** |
| Laccase – Time 0 – 850-950 m/z    | 0.123525 | 0.075012   | 1.646743 | 0.099611 | .   |
| Laccase – Time 24 – 850-950 m/z   | -0.6077  | 0.085603   | -7.09908 | 1.26E-12 | *** |
| Laccase – Time 0 – 950-1050 m/z   | 0.144322 | 0.091934   | 1.569849 | 0.11645  | ns  |
| Laccase – Time 24 – 950-1050 m/z  | -1.38357 | 0.129477   | -10.6858 | 1.19E-26 | *** |
| Laccase – Time 0 – 1050-1150 m/z  | 0.268029 | 0.162234   | 1.652112 | 0.098512 | .   |
| Laccase – Time 24 – 1050-1150 m/z | -1.55587 | 0.249537   | -6.23502 | 4.52E-10 | *** |
| Laccase – Time 0 – 1150-1250 m/z  | 0.131178 | 0.356598   | 0.36786  | 0.712977 | ns  |
| Laccase – Time 24 – 1150-1250 m/z | -1.16068 | 0.510562   | -2.27335 | 0.023005 | .   |
| Laccase – Time 0 – >1250 m/z      | -0.51912 | 0.646474   | -0.80301 | 0.42197  | ns  |
| Laccase – Time 24 – >1250 m/z     | -0.87807 | 0.642135   | -1.36742 | 0.171493 | ns  |

Table S8. Poisson GLM results between Time 0 and Time 2 and 24 for heteroatomic class of CHO<sub>x</sub> compounds. ns represents no significant difference between Treatment, Time points in each oxygen number, with p < 0.1 ‘.’, < 0.05 ‘\*’, < 0.01 ‘\*\*’, < 0.001 ‘\*\*\*’.

|                                    | Estimate | Std. Error | z value  | Pr(> z ) | Significance |
|------------------------------------|----------|------------|----------|----------|--------------|
| TreatmentPositive:Time24:OClassO2  | -0.21869 | 0.576663   | -0.37923 | 0.704515 |              |
| TreatmentPositive:Time24:OClassO3  | -0.37648 | 0.299743   | -1.256   | 0.209116 |              |
| TreatmentPositive:Time24:OClassO4  | -0.26437 | 0.18276    | -1.44654 | 0.148027 |              |
| TreatmentPositive:Time24:OClassO5  | -0.25895 | 0.133641   | -1.93763 | 0.052669 | .            |
| TreatmentPositive:Time24:OClassO6  | -0.27753 | 0.11619    | -2.3886  | 0.016912 | *            |
| TreatmentPositive:Time24:OClassO7  | -0.25994 | 0.103785   | -2.50465 | 0.012257 | *            |
| TreatmentPositive:Time24:OClassO8  | -0.25671 | 0.102409   | -2.50676 | 0.012184 | *            |
| TreatmentPositive:Time24:OClassO9  | -0.33473 | 0.100371   | -3.33491 | 0.000853 | ***          |
| TreatmentPositive:Time24:OClassO10 | -0.3099  | 0.096822   | -3.20073 | 0.001371 | **           |
| TreatmentPositive:Time24:OClassO11 | -0.43014 | 0.095333   | -4.51198 | 6.42E-06 | ***          |
| TreatmentPositive:Time24:OClassO12 | -0.40866 | 0.096051   | -4.25462 | 2.09E-05 | ***          |
| TreatmentPositive:Time24:OClassO13 | -0.36989 | 0.094299   | -3.92251 | 8.76E-05 | ***          |
| TreatmentPositive:Time24:OClassO14 | -0.32638 | 0.098759   | -3.30475 | 0.000951 | ***          |
| TreatmentPositive:Time24:OClassO15 | -0.28214 | 0.104167   | -2.70854 | 0.006758 | **           |
| TreatmentPositive:Time24:OClassO16 | -0.39235 | 0.115004   | -3.41166 | 0.000646 | ***          |
| TreatmentPositive:Time24:OClassO17 | -0.53684 | 0.127114   | -4.22332 | 2.41E-05 | ***          |
| TreatmentPositive:Time24:OClassO18 | -0.66733 | 0.153965   | -4.33428 | 1.46E-05 | ***          |
| TreatmentPositive:Time24:OClassO19 | -0.79273 | 0.18755    | -4.22679 | 2.37E-05 | ***          |
| TreatmentPositive:Time24:OClassO20 | -0.68418 | 0.209284   | -3.26914 | 0.001079 | **           |
| TreatmentPositive:Time24:OClassO21 | -0.7263  | 0.248152   | -2.92684 | 0.003424 | **           |
| TreatmentPositive:Time24:OClassO22 | -2.16613 | 0.556928   | -3.88944 | 0.0001   | ***          |
| TreatmentPositive:Time24:OClassO23 | -1.37948 | 0.44655    | -3.08919 | 0.002007 | **           |
| TreatmentPositive:Time24:OClassO24 | 0.269664 | 0.686759   | 0.392661 | 0.69457  |              |
| TreatmentPositive:Time24:OClassO25 | -1.38629 | 1.554563   | -0.89176 | 0.372523 |              |

Table S9. Poisson GLM results between Time 0 and Time 2 and 24 for heteroatomic class of CHO<sub>x</sub>S<sub>2</sub> compounds. ns represents no significant difference between Treatment, Time points in each oxygen number, with p < 0.1 ‘.’, < 0.05 ‘\*’, < 0.01 ‘\*\*’, < 0.001 ‘\*\*\*’.

|                                    | Estimate | Std. Error | z value  | Pr(> z ) |     |
|------------------------------------|----------|------------|----------|----------|-----|
| TreatmentPositive:Time24:OClassO3  | 0.05001  | 0.332622   | 0.150352 | 0.880487 |     |
| TreatmentPositive:Time24:OClassO4  | 0.227784 | 0.298987   | 0.761852 | 0.446149 |     |
| TreatmentPositive:Time24:OClassO5  | 0.251314 | 0.310239   | 0.810067 | 0.417901 |     |
| TreatmentPositive:Time24:OClassO6  | -0.08004 | 0.389303   | -0.20561 | 0.837099 |     |
| TreatmentPositive:Time24:OClassO7  | -0.30228 | 0.455593   | -0.66349 | 0.507017 |     |
| TreatmentPositive:Time24:OClassO8  | -0.59784 | 0.831209   | -0.71924 | 0.471994 |     |
| TreatmentPositive:Time24:OClassO9  | -0.94504 | 0.649015   | -1.45611 | 0.145361 |     |
| TreatmentPositive:Time24:OClassO10 | -0.96854 | 0.314784   | -3.07684 | 0.002092 | **  |
| TreatmentPositive:Time24:OClassO11 | -0.76447 | 0.234247   | -3.26353 | 0.0011   | **  |
| TreatmentPositive:Time24:OClassO12 | -0.74712 | 0.199496   | -3.74503 | 0.00018  | *** |
| TreatmentPositive:Time24:OClassO13 | -0.4639  | 0.172398   | -2.69089 | 0.007126 | **  |
| TreatmentPositive:Time24:OClassO14 | -0.50493 | 0.168401   | -2.99836 | 0.002714 | **  |
| TreatmentPositive:Time24:OClassO15 | -0.55962 | 0.194828   | -2.87236 | 0.004074 | **  |
| TreatmentPositive:Time24:OClassO16 | -0.50441 | 0.216218   | -2.33288 | 0.019655 | *   |
| TreatmentPositive:Time24:OClassO17 | -0.70779 | 0.298743   | -2.36923 | 0.017825 | *   |
| TreatmentPositive:Time24:OClassO18 | -0.34645 | 0.395834   | -0.87523 | 0.381446 |     |
| TreatmentPositive:Time24:OClassO19 | -0.09353 | 0.430286   | -0.21736 | 0.82793  |     |
| TreatmentPositive:Time24:OClassO20 | -1.09861 | 1.027402   | -1.06931 | 0.28493  |     |

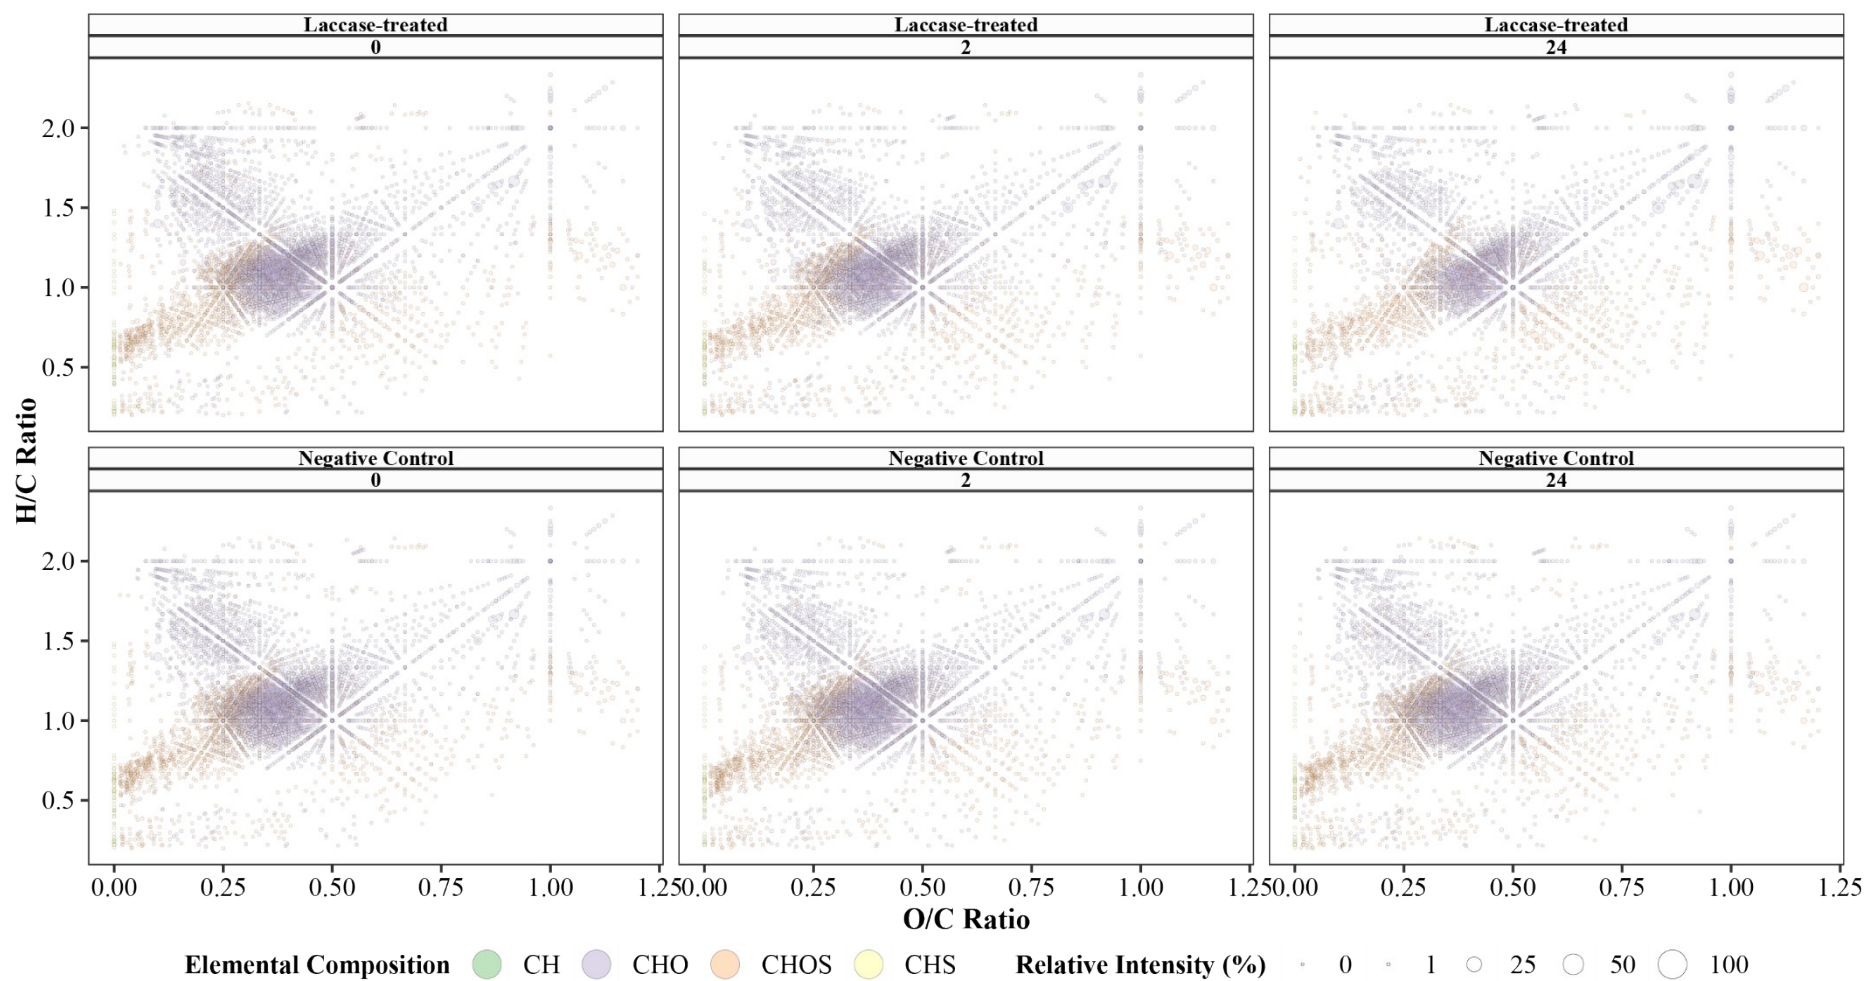

Figure S3. van Krevelen Diagram displaying the relative intensity of each ion in both treatments across the experimental time course, where the size of each point represents the intensity of the ion. Ions are coloured according to their elemental composition. Each van Krevelen diagram is similar, although there is a lower density of ions in the lignin-like region (H/C ratio = 1.15 & O/C ratio = 0.375) after 24 hours of laccase treatment, with no loss in ions observed in the negative control.

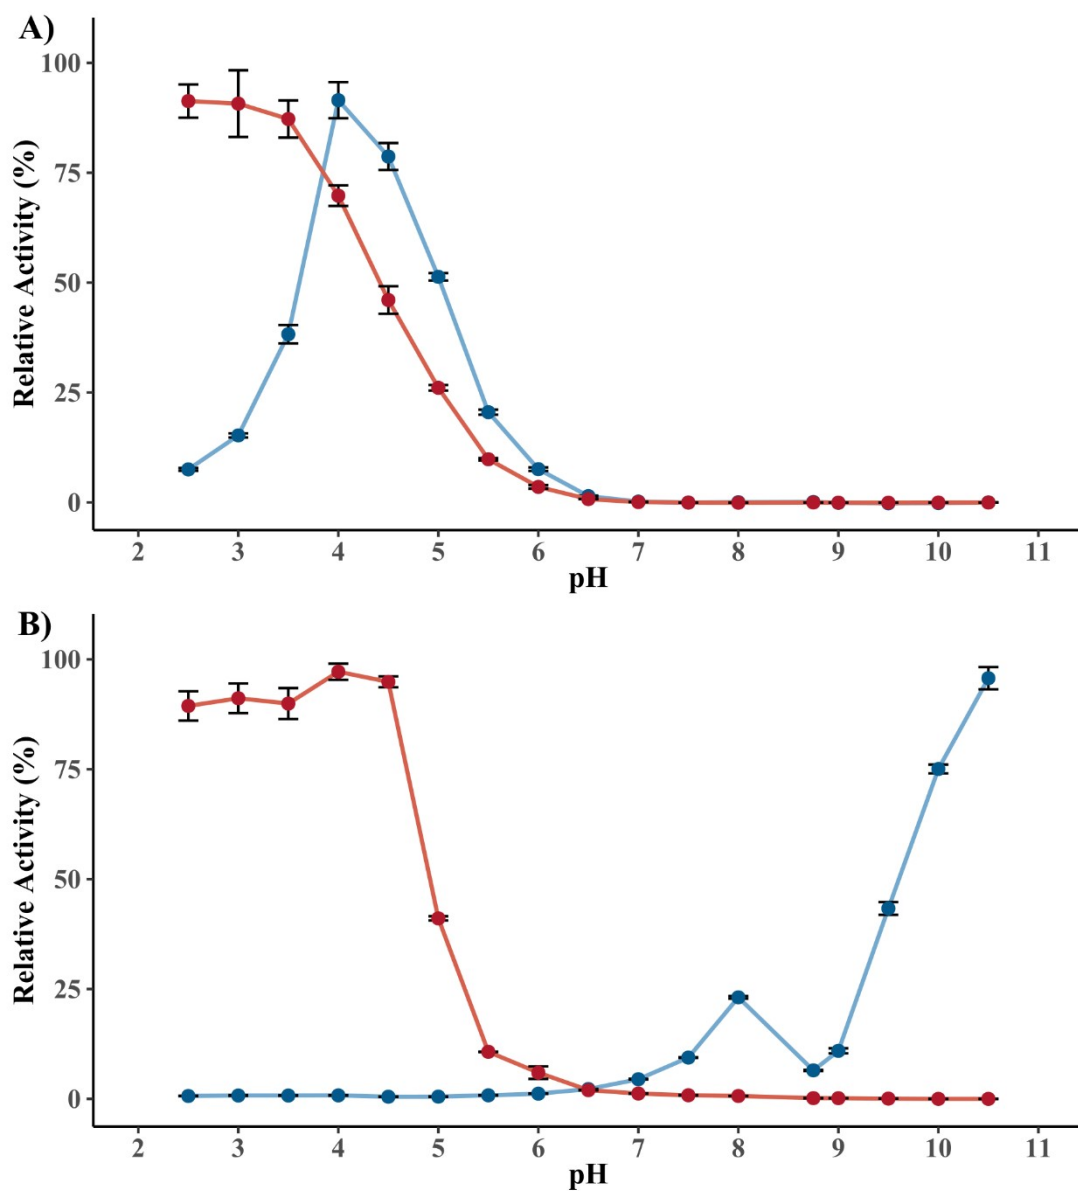

Figure S4, Activity of an acidic-active laccase from *Panus rudis* (*PrL*), expressed in *Pichia pastoris* (A) and MetZyme® laccase (B) across a range of pH values from 2.5 to 10.5. From pH 2.5–8.0 a McIlvaine buffer (20 mM Citrate:Phosphate) was used, above pH 8.0 Glycine:HCl was used. MetZyme® displayed an optimum pH against 2,6-DMP above pH 10.5 as expected, however, the optimum pH for ABTS was < pH 4.5, further indicating the increased ability of ABTS to oxidise at lower pHs.

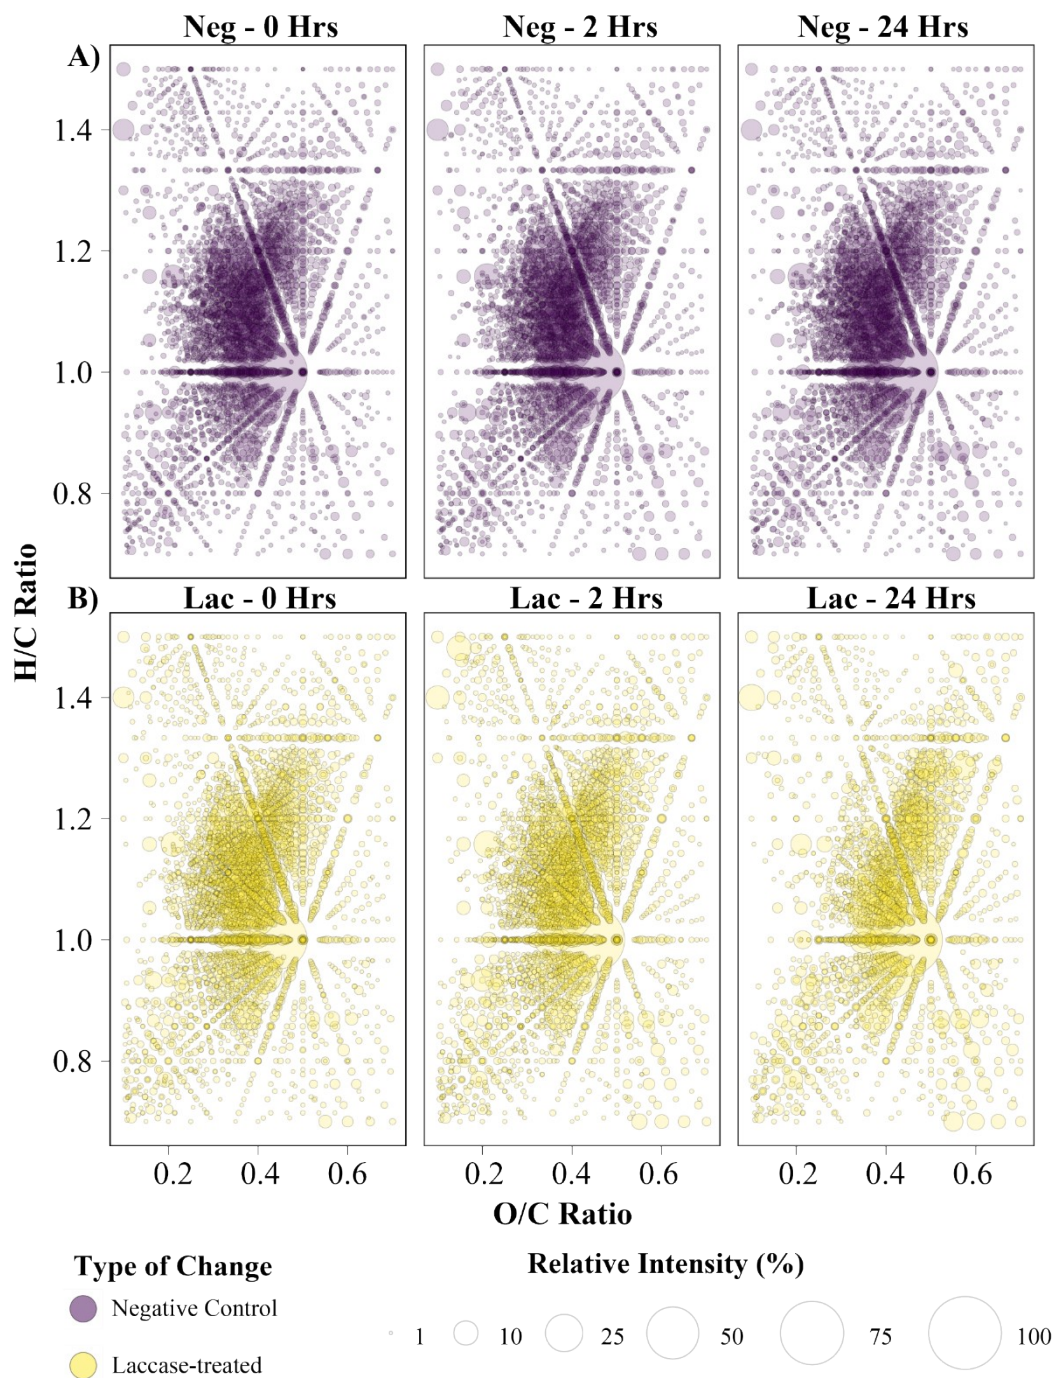

Figure S5. van Krevelen Diagram of RI over the time course. A) The negative control treatment. B) The laccase-treated sample.



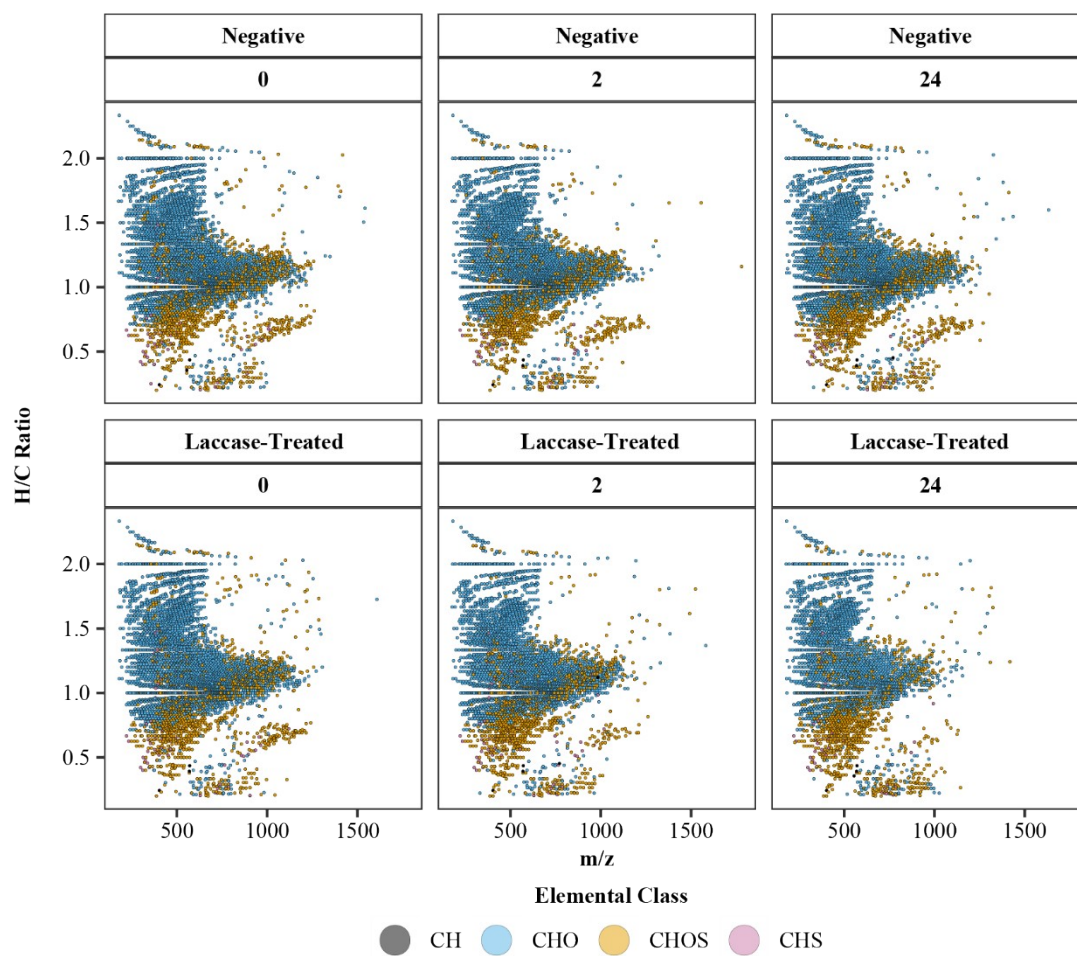

Figure S6. H/C ratio vs m/z plot for the negative control and laccase-treated samples over time.



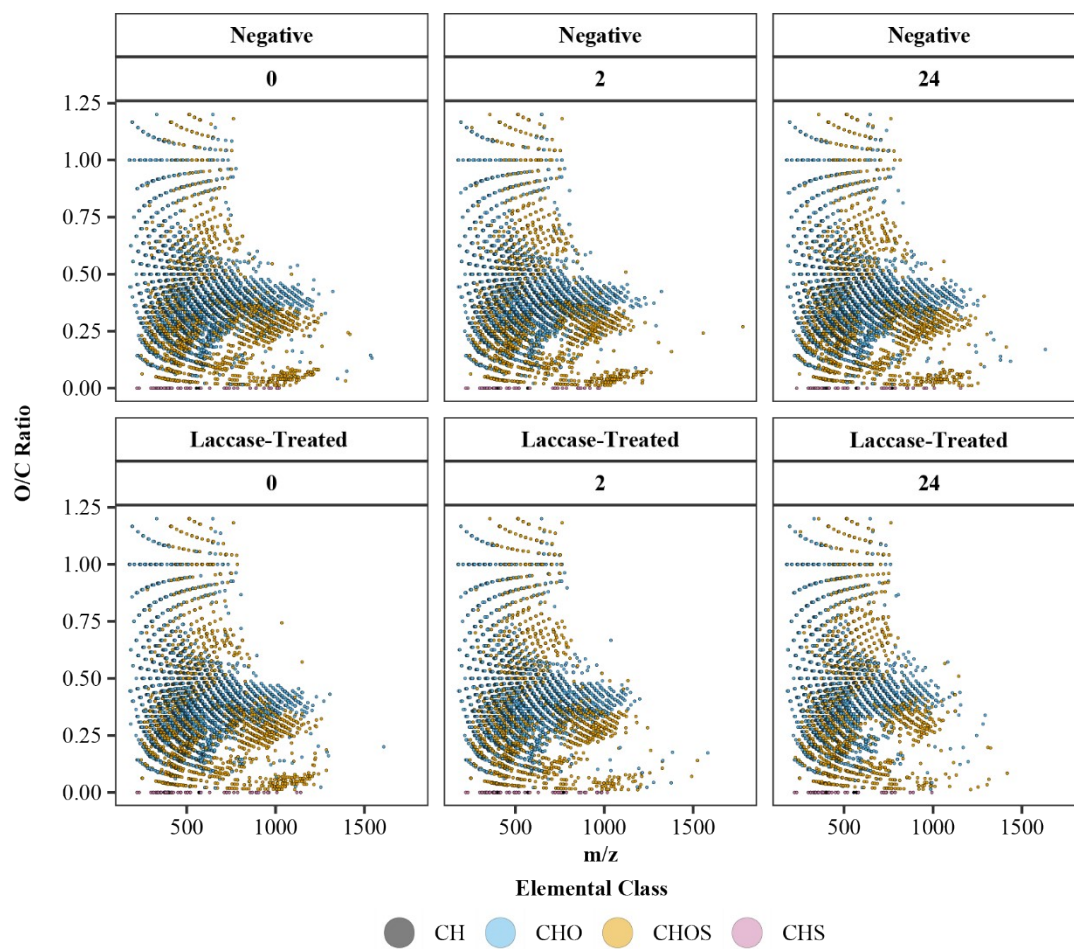

Figure S7. H/C ratio vs m/z plot for the negative control and laccase-treated samples over time.

| Laccase 1                       |                |                |             |             | Laccase 2      |                |             |             | Laccase 3      |                |             |             |
|---------------------------------|----------------|----------------|-------------|-------------|----------------|----------------|-------------|-------------|----------------|----------------|-------------|-------------|
| Object                          | Integral [abs] | Integral [rel] | v(F2) [ppm] | v(F1) [ppm] | Integral [abs] | Integral [rel] | v(F2) [ppm] | v(F1) [ppm] | Integral [abs] | Integral [rel] | v(F2) [ppm] | v(F1) [ppm] |
| $\beta\beta$ $\gamma$ 1 (left)  | 565380         | 0.0133         | 4.2021      | 71.6118     | 786230         | 0.0123         | 4.2021      | 71.6118     | 278640         | 0.0091         | 4.2021      | 71.6118     |
| $\beta\beta$ $\gamma$ 2 (right) | 771290         | 0.0181         | 3.8243      | 71.6557     | 2591100        | 0.0178         | 3.8243      | 71.6557     | 553970         | 0.0181         | 3.8243      | 71.6557     |
| $\beta$ -O-4 $\alpha$           | 2397800        | 0.0564         | 4.8784      | 72.2706     | 1813000        | 0.0586         | 4.8784      | 72.2706     | 1193500        | 0.039          | 4.8784      | 72.2706     |
| $\beta$ -O-4 $\beta$            | 1679800        | 0.0395         | 4.0815      | 86.9393     | 956720         | 0.041          | 4.0815      | 86.9393     | 936210         | 0.0306         | 4.0815      | 86.9393     |
| $\beta$ - $\beta$ $\alpha$      | 907350         | 0.0213         | 4.6879      | 85.5779     | 0.0216         | 0.0216         | 4.6879      | 85.5779     | 489020         | 0.016          | 4.6879      | 85.5779     |
| Aromatic                        | 42545000       | 1              | 7.0056      | 115.4863    | 44200000       | 1              | 7.0056      | 115.4863    | 30625000       | 1              | 7.0056      | 115.4863    |
| $\beta$ - $\beta$ $\beta$       | 806140         | 0.0189         | 3.0782      | 54.0005     | 0.0169         | 0.0169         | 3.0782      | 54.0005     | 584360         | 0.0191         | 3.0782      | 54.0005     |
| Negative 1                      |                |                |             |             | Negative 2     |                |             |             | Negative 3     |                |             |             |
| Object                          | Integral [abs] | Integral [rel] | v(F2) [ppm] | v(F1) [ppm] | Integral [abs] | Integral [rel] | v(F2) [ppm] | v(F1) [ppm] | Integral [abs] | Integral [rel] | v(F2) [ppm] | v(F1) [ppm] |
| $\beta\beta$ $\gamma$ 1 (left)  | 1010700        | 0.0313         | 4.2021      | 71.6118     | 1923900        | 0.0292         | 4.2021      | 71.6118     | 1677600        | 0.0302         | 4.2021      | 71.6118     |
| $\beta\beta$ $\gamma$ 2 (right) | 1194200        | 0.037          | 3.8243      | 71.6557     | 2196600        | 0.0333         | 3.8243      | 71.6557     | 1923000        | 0.0346         | 3.8243      | 71.6557     |
| $\beta$ -O-4 $\alpha$           | 1633200        | 0.0505         | 4.8784      | 72.2706     | 3612300        | 0.0547         | 4.8784      | 72.2706     | 2765900        | 0.0498         | 4.8784      | 72.2706     |
| $\beta$ -O-4 $\beta$            | 1248900        | 0.0387         | 4.0815      | 86.9393     | 2396700        | 0.0363         | 4.0815      | 86.9393     | 2008800        | 0.0361         | 4.0815      | 86.9393     |
| $\beta$ - $\beta$ $\alpha$      | 1221800        | 0.0378         | 4.6879      | 85.5779     | 2278500        | 0.0345         | 4.6879      | 85.5779     | 2006700        | 0.0361         | 4.6879      | 85.5779     |
| Aromatic                        | 32309000       | 1              | 7.0056      | 115.4863    | 65993000       | 1              | 7.0056      | 115.4863    | 55593000       | 1              | 7.0056      | 115.4863    |
| $\beta$ - $\beta$ $\beta$       | 1221100        | 0.0378         | 3.0782      | 54.0005     | 2286700        | 0.0347         | 3.0782      | 54.0005     | 2109000        | 0.0379         | 3.0782      | 54.0005     |

Table S10, NMR Integration values for 24- hour laccase-treated and negative control samples.

This NMR analysis gives rise to their being approximately 0.84 or 1.72  $\beta\beta$  units per 100 C9 units, 4.4 or 4.3  $\beta$ -O-4 linkages per 100 C9 units in the laccase-treated and negative control after 24 hours.

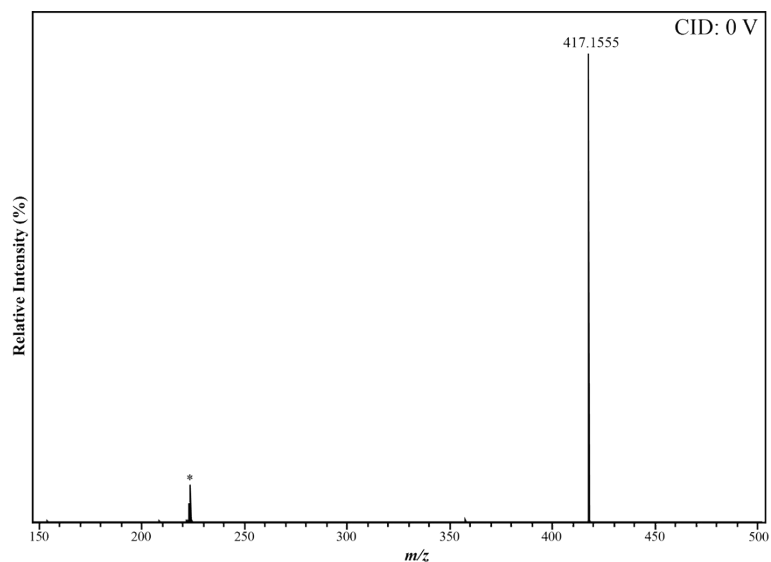

Figure S8. Collision Induced Fragmentation Spectra for the Ion at 417 m/z at 0, 5, and 10 V CID. A contaminating, noise, peak is labelled at 223 m/z is labelled with an asterisk (\*). Spectra represent relative intensity where the most abundant peaks is 100% RI.

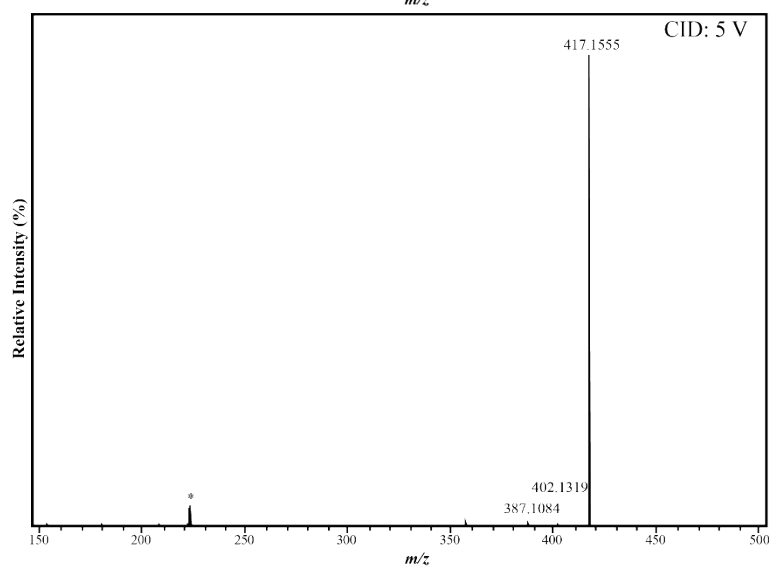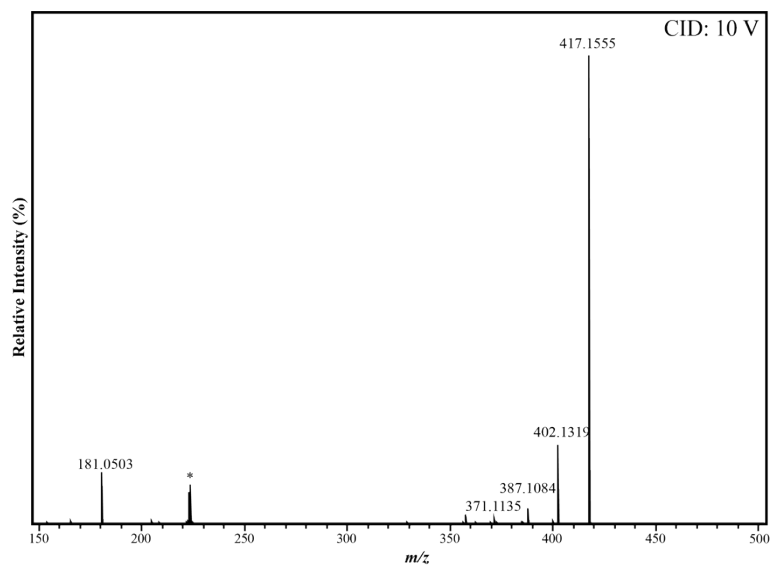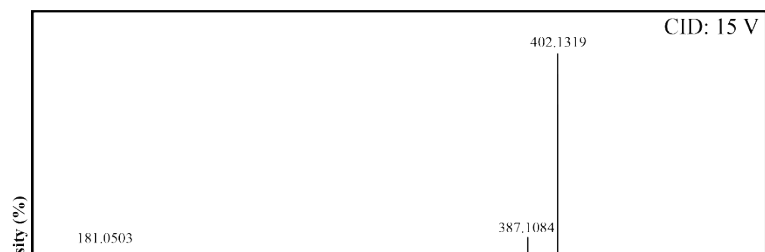

Figure S9. Collision Induced Fragmentation Spectra for the Ion at 417 m/z at 15 and 20 V collision energy, as well as SORI CID. A contaminating, noise, peak is labelled at 223 m/z is labelled with



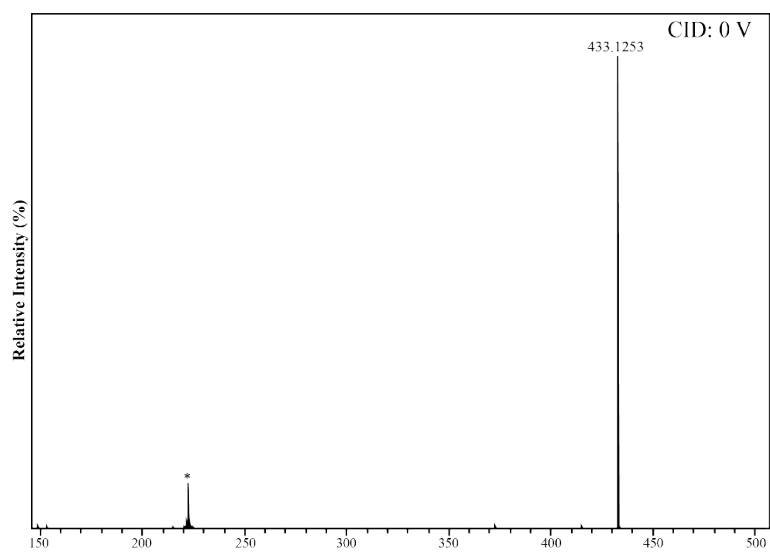

Figure S10. Collision Induced Fragmentation Spectra for the Ion at 433 m/z at 0, 5 and 10 V collision energy. A contaminating, noise, peak is labelled at 223 m/z is labelled with an asterisk (\*). Spectra represent relative intensity where the most abundant peaks is 100% RI.

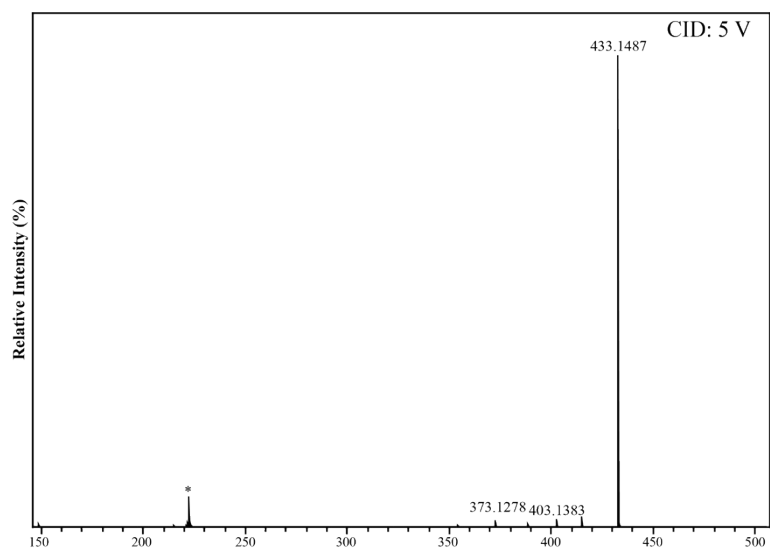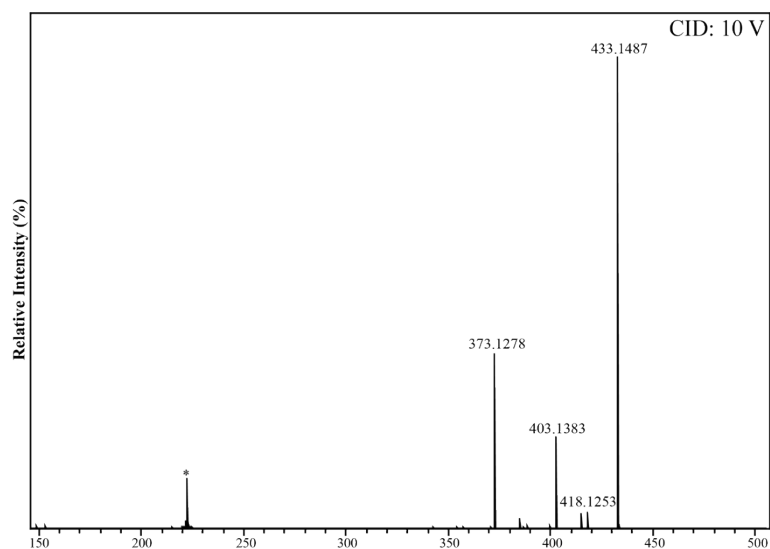

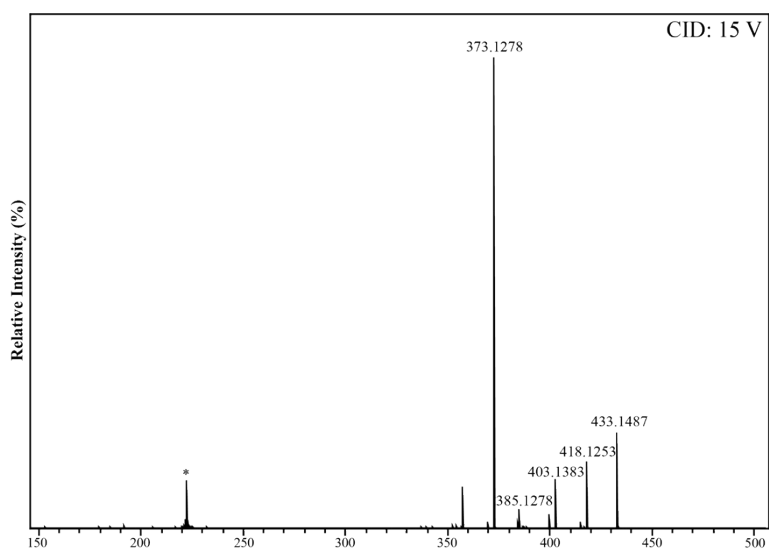

Figure S11. Collision Induced Fragmentation Spectra for the Ion at 433 m/z at 15 and 20 V collision energy. A contaminating, noise, peak is labelled at 223 m/z is labelled with an asterisk (\*). Spectra represent relative intensity where the most abundant peaks is 100% RI.

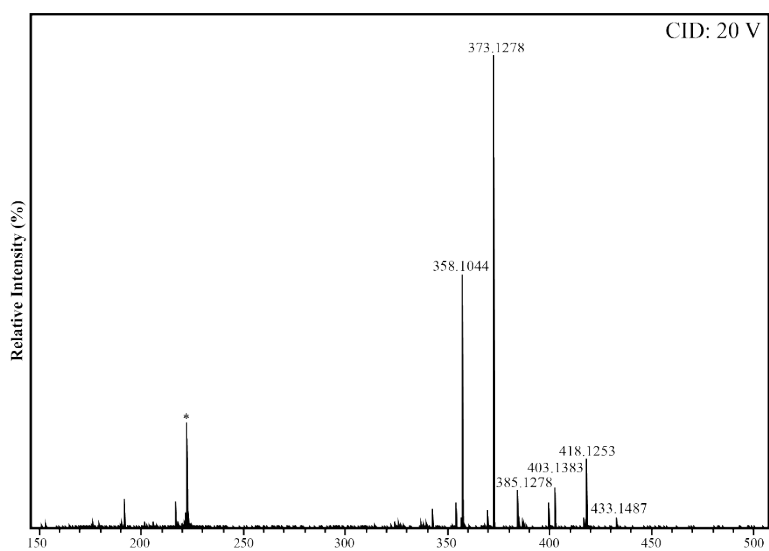

Table S11, Peak List for Ions Present in the CID of the 417  $m/z$  Ion at 20 V.

| Number | $m/z$     | Intensity |
|--------|-----------|-----------|
| 1      | 166.02679 | 9887608   |
| 2      | 181.05026 | 39145764  |
| 3      | 205.08663 | 1174797   |
| 4      | 315.08714 | 1588480   |
| 5      | 329.10281 | 1324511   |
| 6      | 342.11068 | 1119684   |
| 7      | 354.11071 | 1149866   |
| 8      | 357.09779 | 1283046   |
| 9      | 357.13418 | 2959591   |
| 10     | 371.11349 | 1093389   |
| 11     | 372.12131 | 2764836   |
| 12     | 384.12136 | 2256691   |
| 13     | 387.10845 | 41126264  |
| 14     | 387.14484 | 5828986   |
| 15     | 402.12301 | 1490918   |
| 16     | 402.13197 | 68225768  |
| 17     | 417.11913 | 1627753   |
| 18     | 417.1555  | 36752488  |

Table S12, Peak List for Ions Present in the CID of the 433  $m/z$  Ion at 20 V.

| Number | $m/z$     | Intensity |
|--------|-----------|-----------|
| 1      | 28524656  | 967063    |
| 2      | 5860428   | 951019    |
| 3      | 7212613   | 902020    |
| 4      | 26852428  | 870074    |
| 5      | 5315151   | 863668    |
| 6      | 325.07146 | 5362308   |
| 7      | 327.08712 | 5728000   |
| 8      | 340.09496 | 6157883   |
| 9      | 343.08206 | 20621056  |
| 10     | 355.08209 | 25332272  |
| 11     | 357.09775 | 9736891   |
| 12     | 358.10558 | 2.6E+08   |
| 13     | 370.1056  | 16420440  |
| 14     | 385.09273 | 36459168  |
| 15     | 385.12912 | 11446947  |
| 16     | 387.10839 | 5689142   |
| 17     | 388.11623 | 5514113   |
| 18     | 400.11625 | 26720000  |
| 19     | 417.11906 | 10302458  |
| 20     | 418.12688 | 72768584  |
| 21     | 433.1504  | 11976861  |
